# Supplementary material for: Manufacture of High-Efficiency and Stable Lead-Free Solar Cells through Antisolvent Quenching Engineering
Source: MDPI journal article supplement (doi:10.3390/nano12172901), 2022-08-23
Supplement: s1 [file s1]

## Supplementary Materials

**Table S1.** Simulation Parameters of MASnI<sub>3</sub>-based solar cell.

| Parameters                                          | Spiro                  | MASnI <sub>3</sub> | TiO <sub>2</sub> | FTO     |
|-----------------------------------------------------|------------------------|--------------------|------------------|---------|
| Thickness ( <i>um</i> )                             | 0.20                   | Variable           | 0.05             | 0.5     |
| Bandgap (eV)                                        | 3.17                   | Variable           | 3.2              | 3.5     |
| Electron affinity (eV)                              | 2.05                   | 3.49               | 3.9              | 4.0     |
| Dielectric Permittivity                             | 3.00                   | 20.0               | 9.0              | 9.0     |
| CB Effective Density of States (1/cm <sup>3</sup> ) | 2.2 × 10 <sup>18</sup> | 1.0E+19            | 2.0E+17          | 2.2E+18 |
| VB Effective Density of States (1/cm <sup>3</sup> ) | 1.8 × 10 <sup>19</sup> | 1.0E+19            | 6.0E+17          | 1.8E+19 |
| Electron Thermal Velocity (cm/s)                    | 1.0E+7                 | 1.0E+7             | 1.0E+7           | 1.0E+7  |
| Hole Thermal Velocity (cm/s)                        | 1.0E+7                 | 1.0E+7             | 1.0E+7           | 1.0E+7  |
| Electron Mobility (cm <sup>2</sup> /Vs)             | 2.0E-4                 | 2.30E+3            | 1.00E+2          | 2.00E+1 |
| Hole Mobility (cm <sup>2</sup> /Vs)                 | 2.0E-4                 | 3.20E+2            | 2.50E+1          | 1.00E+1 |
| Donor Density ND (1/cm <sup>3</sup> )               | 0.0E+0                 | 1.0E+9             | 1.0E+17          | 1.0E+17 |
| Acceptor Density NA (1/cm <sup>3</sup> )            | 2.0E+19                | 1.0E+9             | 0.0E+0           | 0.0E+0  |
